# Supplementary material
Source: PubMed Central journal article supplement (PMC4538532)
Supplement: AAC.01097-15_zac009154346so1.pdf [file AAC.01097-15_zac009154346so1.pdf]

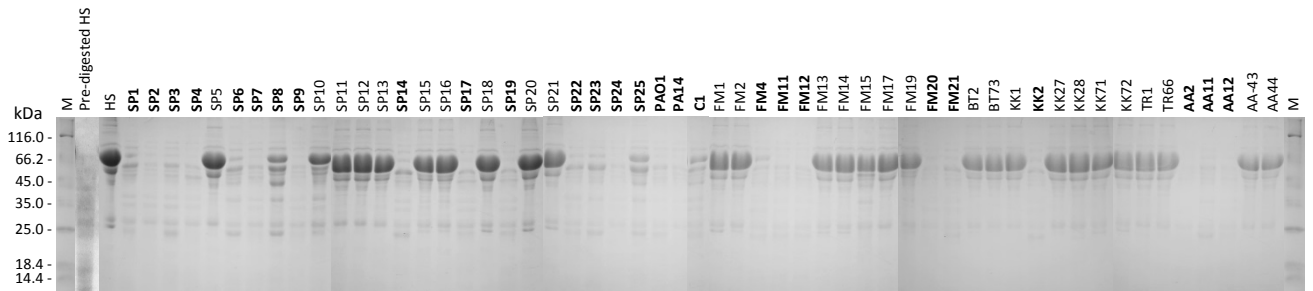

**Figure S1.** SDS-PAGE patterns of supernatants from *P. aeruginosa* cultures in human serum (HS). HS after digestion with proteinase K and uninoculated HS have been included as controls. M, protein molecular weight marker. Strong HS hydrolyzers are reported in bold. The figure is assembled from different merged images.

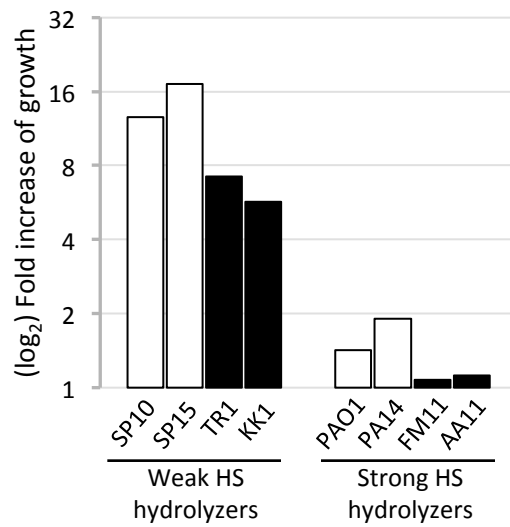

**Figure S2.** Growth stimulation of a selected panel of *P. aeruginosa* strains in pre-digested HS. The fold increase in bacterial growth is relative to the growth in undigested HS. Black and white bars represent CF and non-CF isolates, respectively.

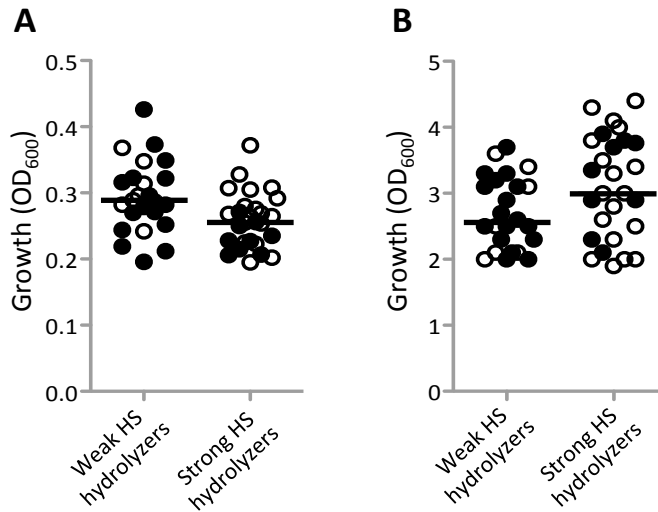

**Figure S3.** (A) Growth (OD<sub>600</sub>) of *P. aeruginosa* clinical isolates in DCAA after 24 h at 37°C. (B) Growth (OD<sub>600</sub>) of *P. aeruginosa* clinical isolates in HS supplemented with both FeCl<sub>3</sub> [640 μM] and Ga(NO<sub>3</sub>)<sub>3</sub> [128 μM] (Fe(III):Ga(III) molar ratio 5:1). For each isolate the mean value of two independent assays is reported. Isolates were grouped according to their ability to hydrolyze HS proteins (see Fig. 1A). The line bar is the median for each group. Black and white dots represent CF and non-CF isolates, respectively.

**TABLE S1** *P. aeruginosa* clinical isolates used in this study

| Strain | Origin | Source  | Serum hydrolysis <sup>a</sup> | PVD production <sup>b</sup> | 3OC <sub>12</sub> -HSL production <sup>c</sup> | C <sub>4</sub> -HSL production <sup>c</sup> | Ga(NO <sub>3</sub> ) <sub>3</sub> MIC (μM) in HS | Ga(NO <sub>3</sub> ) <sub>3</sub> MIC (μM) in DCAA | Ref.      |
|--------|--------|---------|-------------------------------|-----------------------------|------------------------------------------------|---------------------------------------------|--------------------------------------------------|----------------------------------------------------|-----------|
| BT2    | CF     | rs      | -                             | +                           | +                                              | +                                           | 32                                               | 8                                                  | 45        |
| BT73   | CF     | rs      | -                             | +                           | +                                              | +                                           | 16                                               | 16                                                 | 45        |
| KK1    | CF     | rs      | -                             | +                           | +                                              | +                                           | 32                                               | 8                                                  | 45        |
| KK2    | CF     | rs      | +                             | +                           | +                                              | +                                           | 64                                               | 8                                                  | 45        |
| KK27   | CF     | rs      | -                             | +                           | +                                              | +                                           | 64                                               | 8                                                  | 45        |
| KK28   | CF     | rs      | -                             | +                           | +                                              | -                                           | 32                                               | 4                                                  | 45        |
| KK71   | CF     | rs      | -                             | +                           | +                                              | +                                           | 8                                                | 2                                                  | 45        |
| KK72   | CF     | rs      | -                             | +                           | +                                              | +                                           | 8                                                | 2                                                  | 45        |
| TR1    | CF     | rs      | -                             | +                           | +                                              | +                                           | 8                                                | 8                                                  | 45        |
| TR66   | CF     | rs      | -                             | +                           | +                                              | +                                           | 8                                                | 8                                                  | 45        |
| AA2    | CF     | rs      | +                             | +                           | +                                              | +                                           | 64                                               | 8                                                  | 45        |
| AA11   | CF     | rs      | +                             | +                           | +                                              | +                                           | 64                                               | 8                                                  | 45        |
| AA12   | CF     | rs      | +                             | +                           | +                                              | +                                           | 64                                               | 8                                                  | 45        |
| AA43   | CF     | rs      | -                             | +                           | +                                              | +                                           | 16                                               | 1                                                  | 45        |
| AA44   | CF     | rs      | -                             | +                           | +                                              | +                                           | 16                                               | 8                                                  | 45        |
| FM1    | CF     | rs      | nd                            | -                           | -                                              | -                                           | nd                                               | nd                                                 | 27        |
| FM2    | CF     | rs      | -                             | +                           | -                                              | -                                           | 2                                                | 2                                                  | 27        |
| FM4    | CF     | rs      | +                             | +                           | +                                              | +                                           | 64                                               | 4                                                  | 27        |
| FM11   | CF     | rs      | +                             | +                           | +                                              | +                                           | 64                                               | 8                                                  | 27        |
| FM12   | CF     | rs      | +                             | +                           | +                                              | -                                           | 64                                               | 8                                                  | 27        |
| FM13   | CF     | rs      | -                             | +                           | +                                              | +                                           | 16                                               | 16                                                 | 27        |
| FM14   | CF     | rs      | -                             | +                           | +                                              | +                                           | 32                                               | 16                                                 | 27        |
| FM15   | CF     | rs      | -                             | +                           | +                                              | +                                           | 32                                               | 16                                                 | 27        |
| FM17   | CF     | rs      | -                             | +                           | +                                              | -                                           | 32                                               | 8                                                  | 27        |
| FM19   | CF     | rs      | -                             | +                           | +                                              | +                                           | 32                                               | 8                                                  | 27        |
| FM20   | CF     | rs      | +                             | +                           | +                                              | +                                           | 64                                               | 16                                                 | 27        |
| FM21   | CF     | rs      | +                             | +                           | +                                              | +                                           | 64                                               | 8                                                  | 6         |
| SP1    | non-CF | ws      | +                             | +                           | +                                              | +                                           | 32                                               | 32                                                 | This work |
| SP2    | non-CF | ulcer   | +                             | +                           | +                                              | +                                           | 64                                               | 16                                                 | This work |
| SP3    | non-CF | ws      | +                             | +                           | +                                              | +                                           | 64                                               | 8                                                  | This work |
| SP4    | non-CF | ws      | +                             | +                           | +                                              | +                                           | 64                                               | 16                                                 | This work |
| SP5    | non-CF | ws      | -                             | +                           | +                                              | +                                           | 16                                               | 4                                                  | This work |
| SP6    | non-CF | blood   | +                             | +                           | +                                              | +                                           | 64                                               | 8                                                  | This work |
| SP7    | non-CF | blood   | +                             | +                           | +                                              | +                                           | 64                                               | 8                                                  | This work |
| SP8    | non-CF | wd      | +                             | +                           | +                                              | +                                           | 32                                               | 8                                                  | This work |
| SP9    | non-CF | cvc     | +                             | +                           | +                                              | +                                           | 64                                               | 8                                                  | This work |
| SP10   | non-CF | blood   | -                             | +                           | +                                              | +                                           | 8                                                | 1                                                  | This work |
| SP11   | non-CF | ascites | -                             | +                           | -                                              | -                                           | 32                                               | 16                                                 | This work |
| SP12   | non-CF | pe      | -                             | +                           | +                                              | +                                           | 32                                               | 8                                                  | This work |
| SP13   | non-CF | blood   | -                             | +                           | +                                              | +                                           | 64                                               | 8                                                  | This work |
| SP14   | non-CF | wd      | +                             | +                           | +                                              | +                                           | 32                                               | 8                                                  | This work |
| SP15   | non-CF | pe      | -                             | +                           | +                                              | +                                           | 4                                                | 1                                                  | This work |
| SP16   | non-CF | bile    | -                             | +                           | +                                              | +                                           | 16                                               | 8                                                  | This work |
| SP17   | non-CF | ws      | +                             | +                           | +                                              | +                                           | 32                                               | 8                                                  | This work |

|      |        |       |    |   |   |   |    |    |           |
|------|--------|-------|----|---|---|---|----|----|-----------|
| SP18 | non-CF | bile  | nd | - | + | + | nd | nd | This work |
| SP19 | non-CF | pe    | +  | + | + | + | 64 | 8  | This work |
| SP20 | non-CF | blood | nd | - | + | - | nd | nd | This work |
| SP21 | non-CF | pe    | nd | - | + | + | nd | nd | This work |
| SP22 | non-CF | ws    | +  | + | + | + | 64 | 8  | This work |
| SP23 | non-CF | wd    | +  | + | + | + | 32 | 16 | This work |
| SP24 | non-CF | bile  | +  | + | + | + | 64 | 32 | This work |
| SP25 | non-CF | wd    | +  | + | + | - | 64 | 8  | This work |
| C1   | non-CF | blood | +  | + | + | - | 32 | 16 | 46        |
| PA14 | non-CF | burn  | +  | + | + | + | 64 | 8  | 16        |
| PAO1 | non-CF | ATCC  | +  | + | + | + | 64 | 8  | ATCC      |

Abbreviations: CF, cystic fibrosis; PVD, pyoverdine; 3OC<sub>12</sub>-HSL, N-3-oxododecanoyl homoserine lactone; C<sub>4</sub>-HSL, N-butanoyl-l-homoserine lactone; rs, respiratory secretions; cvc, central venous catheter; ws, wound swab; wd, wound drainage; pe, pleural exudate; HS: complement-free human serum; nd, not determined due to the inability of the strain to grow in HS.

<sup>a</sup> Isolates which hydrolyze  $\geq 10$  % of serum proteins are marked with (+).

<sup>b</sup> Production of PVD was assessed in DCAA according to ref. 19

<sup>c</sup> Production of HSL signal molecules was measured according to ref. 27.

Additional references not include in the main text:

45. **Bragonzi A, Paroni M, Nonis A, Cramer N, Montanari S, Rejman J, Di Serio C, Döring G, Tümmler B.** 2009. *Pseudomonas aeruginosa* microevolution during cystic fibrosis lung infection establishes clones with adapted virulence. *Am. J Respir Crit Care Med* **180**: 138-145.
46. **Lanini S, D'Arezzo S, Puro V, Martini L, Imperi F, Piselli P, Montanaro M, Paoletti S, Visca P, Ippolito G.** 2011. Molecular epidemiology of a *Pseudomonas aeruginosa* hospital outbreak driven by a contaminated disinfectant-soap dispenser. *PLoS One* **6**: e17064.
